# Supplementary material for: A novel HBI-based ratiometric fluorescent probe for rapid detection of trifluoroborate
Source: Royal Society of Chemistry journal article supplement (doi:10.1039/d3ra04474b), 2023-01-01
Supplement: d3ra04474b1.pdf [file d3ra04474b1.pdf]

## Supporting Information

### **A ratiometric fluorescent probe of novel HBI derivative for rapid detection of trifluoroborate**

Gao Liang<sup>1</sup>, Zheng Minghao<sup>2</sup>, Liu Haiyi<sup>3</sup>, Xiao Jun<sup>2</sup>, Gong Tianhao<sup>2</sup>, Liu Kunming<sup>2\*</sup>, Li

Juanhua<sup>2\*</sup>, Jin-Biao Liu<sup>2\*</sup>

<sup>1</sup> Ganzhou Teacher's College, Ganzhou, Jiangxi 341000, P. R. of China.

<sup>2</sup> Jiangxi Provincial Key Laboratory of Functional Molecular Materials Chemistry, Faculty of Materials Metallurgy and Chemistry, Jiangxi University of Science and Technology, 86 Hongqi Road, Ganzhou 341000, P. R. of China.

E-mail: liukunming@jxust.edu.cn; lijuanhua@jxust.edu.cn; liujinbiao@jxust.edu.cn.

<sup>3</sup> Ganzhou No.3 Middle School, Ganzhou, Jiangxi 341000, China.

## Contents

|                                                                                          |          |
|------------------------------------------------------------------------------------------|----------|
| <b>1 EXPERIMENTAL .....</b>                                                              | <b>1</b> |
| <b>1.1 Materials and Methods .....</b>                                                   | <b>1</b> |
| <b>1.2 General Instrumentation .....</b>                                                 | <b>1</b> |
| <b>1.3 Characterization of HTEP and BTEP.....</b>                                        | <b>1</b> |
| <b>1.4 Detection of BF<sub>3</sub> in different solvents .....</b>                       | <b>6</b> |
| <b>1.5 Detection of BF<sub>3</sub> in different incubation time .....</b>                | <b>6</b> |
| <b>1.6 Emission titration experiments .....</b>                                          | <b>6</b> |
| <b>1.7 Detection of BF<sub>3</sub> with interference substances.....</b>                 | <b>7</b> |
| <b>1.8 Detection mechanism experiment .....</b>                                          | <b>7</b> |
| <b>1.9 Preparation of test strip and naked-eye detection of BF<sub>3</sub> gas .....</b> | <b>7</b> |
| <b>2. COMPARISON OF THE NOVEL FLUORESCENT PROBE WITH OTHER<br/>REPORTED PORBES.....</b>  | <b>8</b> |
| <b>3. REFERENCE .....</b>                                                                | <b>9</b> |

## 1 EXPERIMENTAL

### 1.1 Materials and Methods

5-Bromosalicylaldehyde, ethyltrimethylsilane, o-phenylenediamine, PdCl<sub>2</sub>(PPh<sub>3</sub>)<sub>2</sub>, PPh<sub>3</sub>, CuI, trifluoroborate ethyl ether solution, bis(pinacolato)diboron, boric acid, phenylboronic acid, allyl trifluoroborate potassium, hydrogen fluoride, trifluoroacetic acid, potassium fluoride, tetrabutylammonium fluoride and organic solvents were purchased from Shanghai Aladdin Bio-Chem Technology Co, LTD. Unless otherwise stated, commercial reagents were used without further purification. Tetrahydrofuran and triethylamine were distilled from standard drying agents. The testing solvents were prepared with dichloromethane.

### 1.2 General Instrumentation

Emission spectra were performed on a Fluorescence spectrometer (F-4600). Error limits were estimated:  $\lambda$  ( $\pm 1$  nm);  $\tau$  ( $\pm 10\%$ );  $\phi$  ( $\pm 10\%$ ). IR spectra were recorded on Vario EL.III Fourier transform infrared spectrometer (Elementar, Germany). <sup>1</sup>H NMR (400 MHz) and <sup>13</sup>C NMR (100 MHz) spectra were recorded on Bruker Avance AV400 spectrometer (Bruker, Billerica, MA, USA) unless otherwise noted. The chemical shifts ( $\delta$ ) were quoted in parts per million from tetramethylsilane for <sup>1</sup>H and for <sup>13</sup>C spectroscopy.

### 1.3 Characterization of HTEP and BTEP

The <sup>1</sup>H NMR and <sup>13</sup>C NMR spectroscopy of **HTEB** shown as Figure S1 and S2. <sup>1</sup>H NMR (400 MHz, CDCl<sub>3</sub>)  $\delta$  11.04 (s, 1H), 9.78 (s, 1H), 7.64 (d,  $J = 2.1$  Hz, 1H), 7.53 (dd,  $J = 8.7, 2.1$  Hz, 1H), 6.87 (d,  $J = 8.7$  Hz, 1H), 0.18 (s, 9H); <sup>13</sup>C NMR (400 MHz, CDCl<sub>3</sub>)  $\delta$  196.2, 161.6, 140.2, 137.5, 120.4, 118.0, 115.2, 103.2, 93.9, 0.0. The <sup>1</sup>H NMR spectrum exhibits the typical signals for **HTEB**. The chemical shift of CHO

have a peak splitting of 9.78 ppm, and the chemical shift of -OH proton shifted down field at 11.04 ppm. The dd peak range from 7.52 to 7.54 ppm corresponding to the aromatic hydrogens at the ortho- position of -CHO group. The d peaks of 6.87 and 7.64 ppm represent of the aromatic hydrogen at the meta- and ortho- position of the -CHO group, respectively. The single peak at 0.18 ppm was the typical signal of the aromatic hydrogen at the Trimethylsilyl group. The  $^{13}\text{C}$  NMR spectrum exhibits 10 peaks, which fully agree with the proposed structure for **HTEB**. The FT-IR spectra shown as Fig. S3, The hydroxyl groups, alkynyl groups, aldehyde groups in the **HTEB** molecule is confirmed by characteristic absorption peaks at 3210 nm, 2150 nm, and 1667 nm.

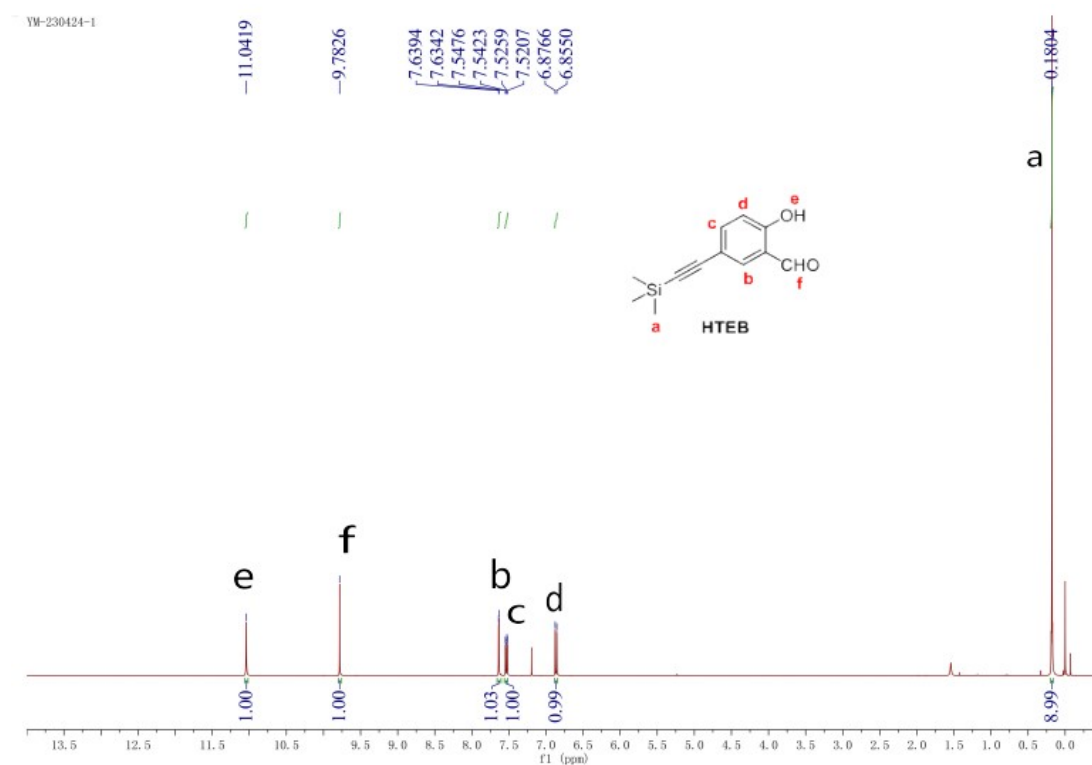

**Figure S1.**  $^1\text{H}$  NMR spectrum (400 MHz,  $\text{CDCl}_3$ ) of **HTEB**

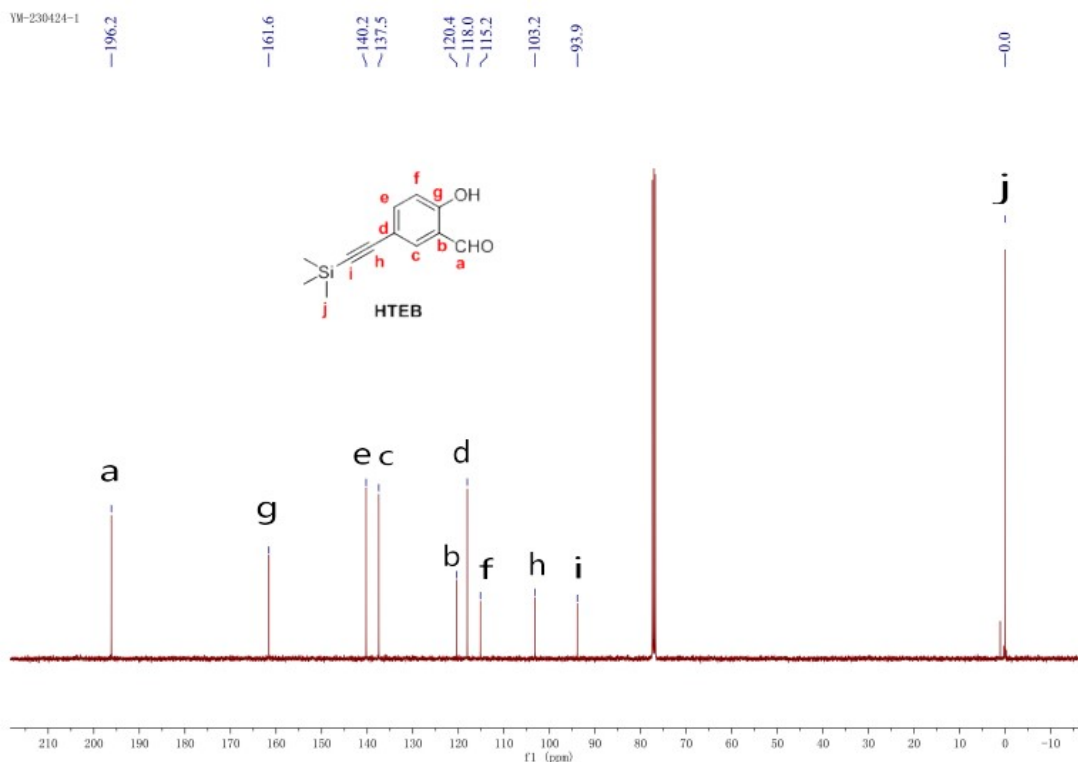

**Figure S2.**  $^{13}\text{C}$  NMR spectrum (100 MHz,  $\text{CDCl}_3$ ) of HTEB

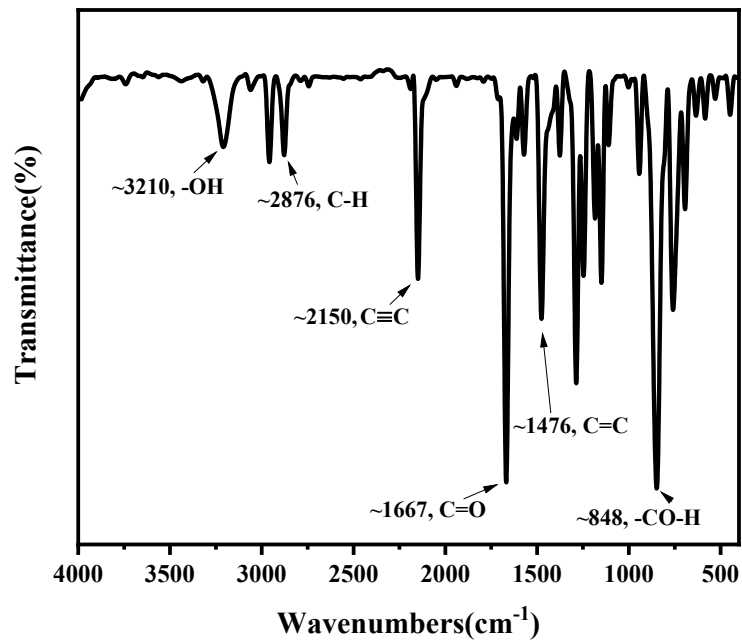

**Figure S3.** FT-IR spectrum of HTEB

The  $^1\text{H}$  NMR and  $^{13}\text{C}$  NMR spectroscopy of BTEP shown as Figure S4 and S5.  $^1\text{H}$  NMR (400 MHz,  $\text{DMSO-d}_6$ )  $\delta$  13.62 (s, 1H), 13.36 (s, 1H), 8.27 (d,  $J = 1.9$  Hz, 1H), 7.67-7.72 (m, 2H), 7.30-7.46 (m, 3H), 7.04 (d,  $J = 8.5$  Hz, 1H), 0.25 (s, 9H);  $^{13}\text{C}$

NMR (400 MHz, DMSO-d6)  $\delta$  158.0, 156.6, 150.2, 149.8, 140.0, 134.2, 133.5, 129.3, 127.9, 119.0, 117.3, 114.1, 112.4, 104.5, 91.9, 0.5. The  $^1\text{H}$  NMR spectrum exhibits the typical signals for **BTEP**. The peaks of 13.36 ppm and 13.62 ppm attributed to the chemical shifts of -OH at benzene ring and -NH proton in benzimidazole. The peaks range from 7.03 to 8.27 ppm corresponding to the aromatic hydrogens at the benzimidazole and Benzene ring. The single peak at 0.25 ppm was the typical signal of the aromatic hydrogen at the Trimethylsilyl group. The  $^{13}\text{C}$  NMR spectrum exhibits 16 peaks, which fully agree with the proposed structure for **BTEP**. The FT-IR spectra shown as Fig. S6, The hydroxyl groups, alkynyl groups, imine groups in the **BTEP** molecule is confirmed by characteristic absorption peaks at 3288 nm, 2152 nm, and 1585 nm.

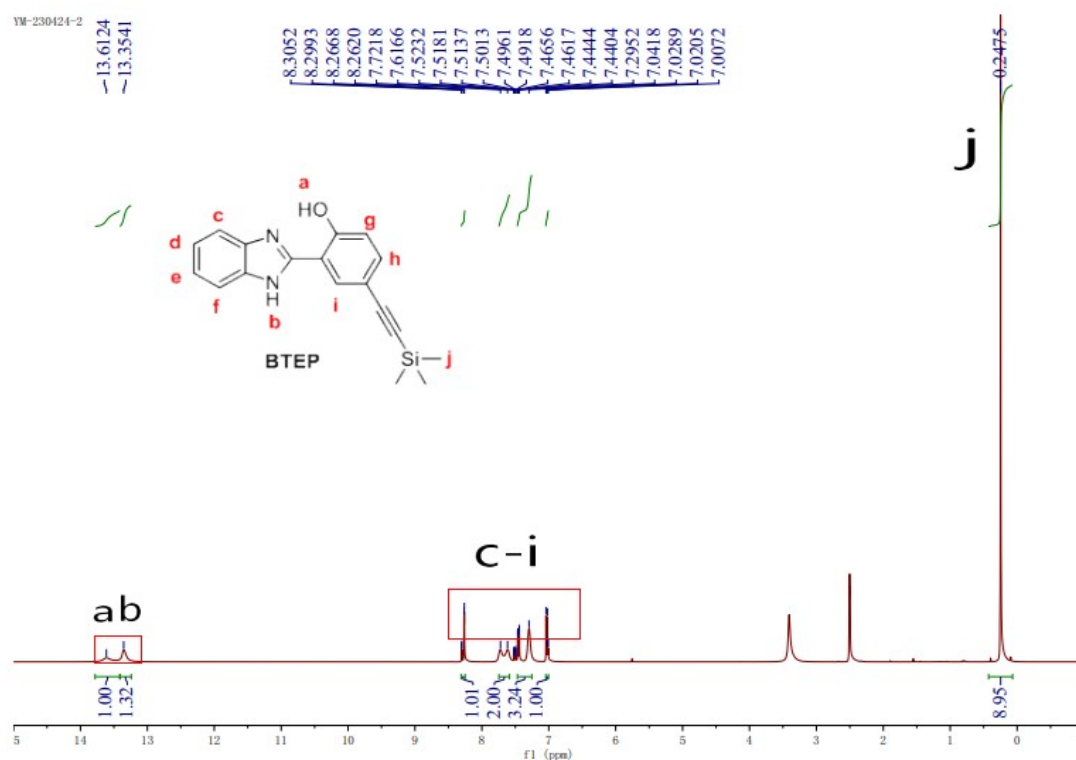

**Figure S4.**  $^1\text{H}$  NMR spectrum (400 MHz, DMSO-d6) of **BTEP**

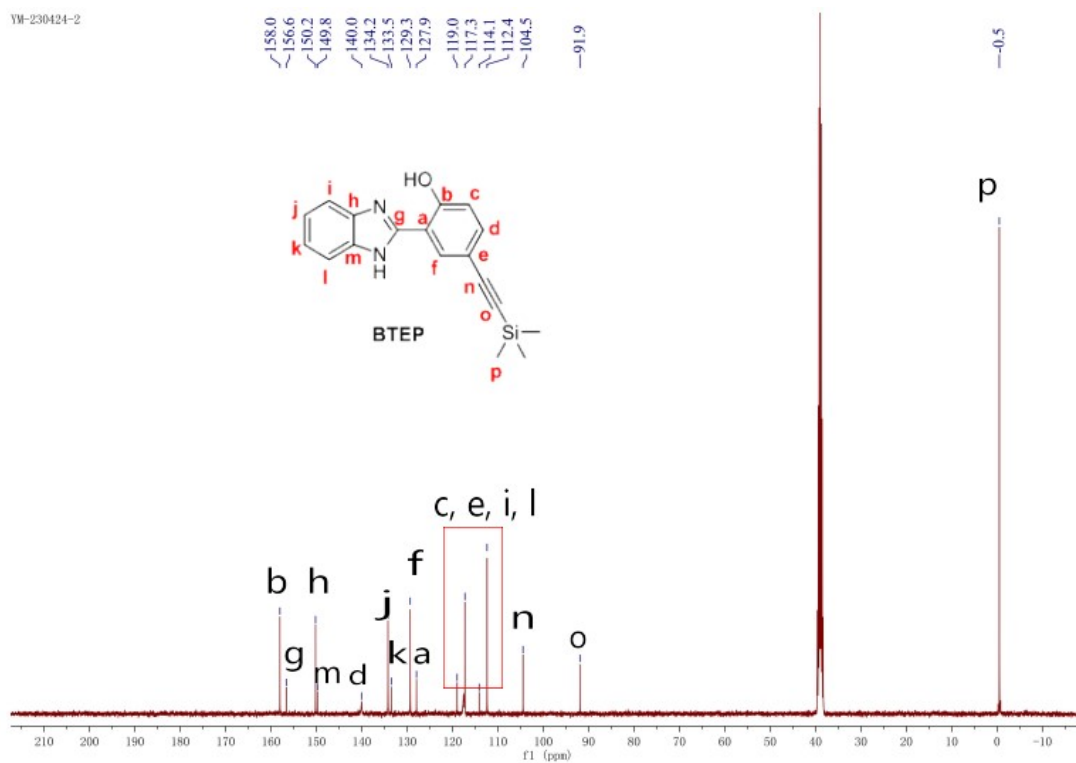

**Figure S5.**  $^{13}\text{C}$  NMR spectrum (100 MHz, DMSO- $d_6$ ) of BTEP

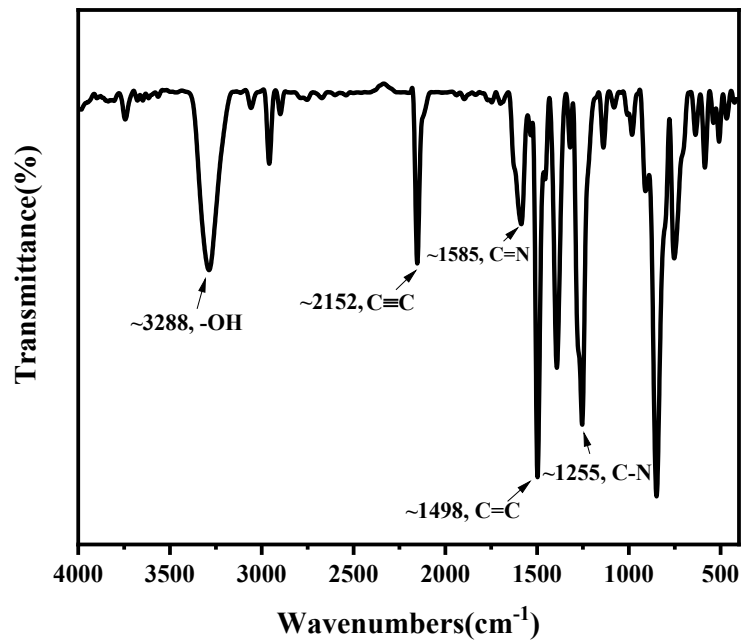

**Figure S6.** FT-IR spectrum of BTEP

#### **1.4 Detection of BF<sub>3</sub> in different solvents**

The stock solutions of **BTEP** (5 mM) and BF<sub>3</sub> were prepared in DCM, ACN, DMF or DMSO solvents. **BTEP** (100 μM) was mixed with BF<sub>3</sub> (200 μM) in according solvents, and then the mixture was incubated at room temperature for 60 s. Emission spectra were measured in the range of 365 nm to 700 nm with an excitation wavelength at 345 nm, and the slit width is 10 nm/20 nm.

#### **1.5 Detection of BF<sub>3</sub> in different incubation time**

The stock solutions of **BTEP** (5 mM), BF<sub>3</sub> (5 mM) were prepared in DCM. Various amount of those stock solutions were added into DCM, diluting to the testing solution consist of **BTEP** (100 μM) and BF<sub>3</sub> (200 μM). Then the mixture was incubated at room temperature for different time. Under the same conditions, a detection system without BF<sub>3</sub> was used as the control group. Emission spectra were measured in the range of 365 nm to 700 nm with an excitation wavelength at 345 nm, and the slit width is 10 nm/20 nm.

#### **1.6 Emission titration experiments**

The **BTEP** stock solution was added into DCM to a final concentration of 50 μM. A various concentrations of BF<sub>3</sub> (0-100 μM) were then added to DCM containing **BTEP** (50 μM) in a cuvette. Then emission spectra were measured in the range of 365 nm to 700 nm with an excitation wavelength at 345 nm, and the slit width is 10 nm/20 nm.

#### **1.7 Detection of BF<sub>3</sub> with interference substances**

5 mM of various common borates and fluorides were prepared in DCM as stock



solutions. Various interferers (50  $\mu$ M bis(pinacolato)diboron, boric acid, phenylboronic acid, allyl trifluoroborate potassium, hydrogen fluoride, trifluoroacetic acid, potassium fluoride, tetrabutylammonium fluoride), instead of  $\text{BF}_3$ , were added to DCM solution containing **BTEP** (100  $\mu$ M), and the mixture was incubated at room temperature for 60 s. Emission spectra were measured in the range of 365 nm to 700 nm with an excitation wavelength at 345 nm, and the slit width is 10 nm/20 nm.

### **1.8 Detection mechanism experiment**

5 mM of **BTEP** was prepared in  $\text{CDCl}_3$  as blank testing solution for  $^1\text{H}$  NMR, and then recorded on Bruker Avance AV400 spectrometer (Bruker, Billerica, MA, USA). 5 mM of  $\text{BF}_3$  in  $\text{CDCl}_3$  was added into the blank testing solution, then the mixture was incubated at room temperature for 60 s, and recorded on Bruker Avance AV400 spectrometer .

### **1.9 Preparation of test strip and naked-eye detection of $\text{BF}_3$ gas**

The paper strip was prepared by soaking filter paper (Whatman<sup>TM</sup> #.2) with the solution of **BTEP** (5.0%, w/w, DCM). After drying in the vacuum oven, the paper strip was cut into 1.0  $\times$  4.0 cm rectangle shape. To detect the gaseous  $\text{BF}_3$ , prepared paper strip was fastened to the wall of a vial (30 mL). After removing the air in the vials using a high vacuum pump, different concentrations of  $\text{BF}_3$  solution were added into the vials avoiding direct contact with the paper strip. Finally, to facilitate vaporization of the  $\text{BF}_3$  species, the vials were preheated to 50  $^\circ\text{C}$ , and then the detection were proceeded at room temperature.

## **2. COMPARISON OF THE NOVEL FLUORESCENT PROBE WITH OTHER REPORTED PORBES.**

The sensitivity data of several fluorescent probes for the detection of  $\text{BF}_3$  were

compared with the proposed probe as shown in table S1. It can be seen that the proposed fluorescent probe possesses the lower detection limit, the wider linear range and higher sensitivity compared with the reported probe.

Table S1 Comparison of novel BF<sub>3</sub> probe with other previously reported fluorescent probe.

| Entry | Probe                                                                               | Ex/Em (nm)   | Response time (s) | Linear range (μM) | LOD (nM)              | Ref. |
|-------|-------------------------------------------------------------------------------------|--------------|-------------------|-------------------|-----------------------|------|
| 1     | 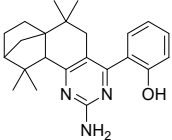   | 300/428      | 60                | 0-10 μM           | 13.4                  | S1   |
| 2     |   | - /586       | < 60              | 1-9 μM            | 1.4                   | S2   |
| 3     |  | 455/533, 586 | < 60              | 130-200 μM        | 2.7 × 10 <sup>4</sup> | S3   |
| 4     |  | 343/430      | < 60              | -                 | 500                   | S4   |
| 5     |  | 365/408, 464 | 90                | 0-80 μM           | 550                   | S5   |
| 6     |  | 280/475, 650 | 5                 | 0-100 μM          | 350                   | S6   |

|   |                                                                                               |                 |    |              |      |              |
|---|-----------------------------------------------------------------------------------------------|-----------------|----|--------------|------|--------------|
| 7 | 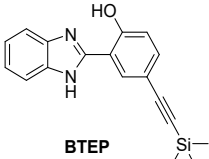 <p>BTEP</p> | 345/408,<br>479 | 60 | 5-50 $\mu$ M | 69.5 | This<br>work |
|---|-----------------------------------------------------------------------------------------------|-----------------|----|--------------|------|--------------|

---

### 3. REFERENCE

- [S1] Z. L. Wang, Y. Zhang, J. Song, Y. Y. Wang, M. X. Li, Y. Q. Yang, X. Xu, H. J. Xu, S. F. Wang. *Sens. Actuators, B*, **2020**, 304, 127083.
- [S2] Y. Z. Wang, Y. Yang, F. Z. Qiu, Y. Feng, X. R. Song, G. L. Zhang, W. S. Liu. *Sens. Actuators, B*, **2018**, 276, 166.
- [S3] Y. M. Liu, J. Y. Zhang, Y. Z. Wang, C. Y. Liu, G. L. Zhang, W. S. Liu. *Sens. Actuators, B*, **2017**, 243, 940.
- [S4] M. G. Choi, S. H. Lee, Y.-U. Jung, J. M. Hong, S.-K. Chang. *Sens. Actuators, B*, **2017**, 251, 713.
- [S5] H. J. Zhao, T. Wu, Y. Sun, L. Duan, Y. Y. Ma. *Chem. J. Chinese U.*, **2021**, 42, 2422.
- [S6] C. K. Lin, J. Wang, K. Yang, J. B. Liu, D.-L. Ma, C.-H. Leung, W. H. Wang. *Spectrochim. Acta. A Mol. Biomol. Spectrosc.*, **2022**, 282, 121658.
